# Supplementary material
Source: HighWire-hosted journal article supplement (https://heart.bmj.com/content/104/23/1955)

**Supplemental Figure. Illustrative CMR Late Gadolinium Images** at baseline (A, B) and follow-up (C,D). Extensive anterior infarction in the (A) 2-chamber and (B) mid-ventricular short-axis views at baseline, demonstrating extensive microvascular obstruction, and corresponding views at follow up, (C) and (D).


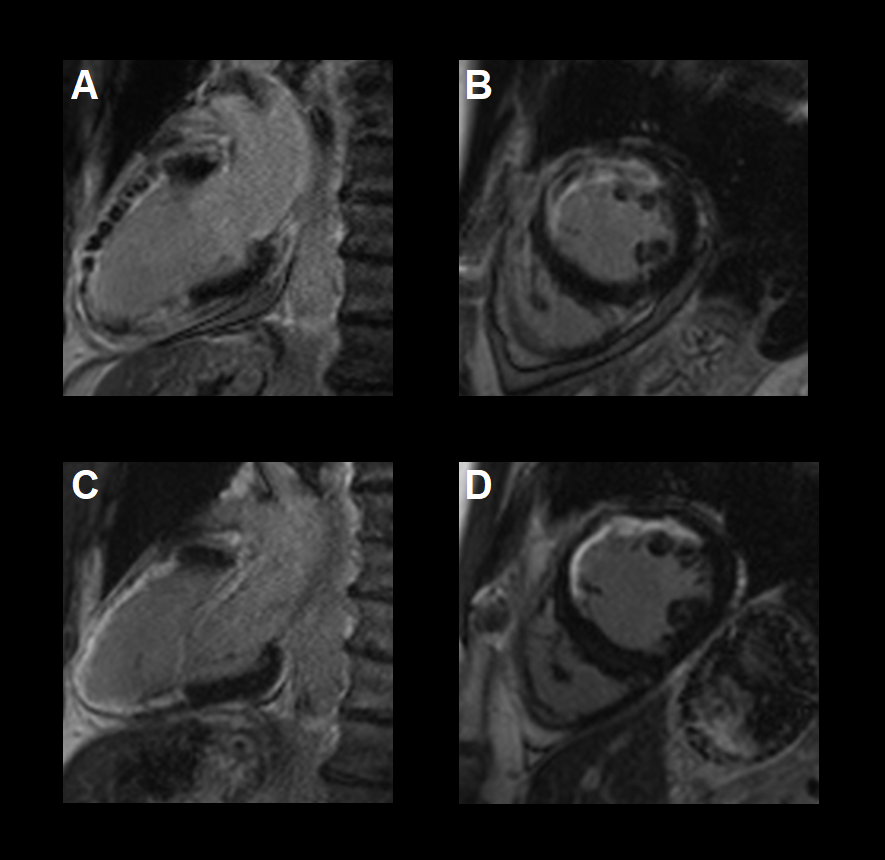

Supplement: inline-supplementary-material-1 [file inline-supplementary-material-1.docx]
